# Supplementary material for: PSIONplus: Accurate Sequence-Based Predictor of Ion Channels and Their Types
Source: PubMed Central journal article supplement (PMC4820270; doi:10.1371/journal.pone.0152964), 2016-04-04
Supplement: pone.0152964.s001.pdf [file pone.0152964.s001.pdf]

## Supporting Information File 1

### **PSIONplus: accurate sequence-based predictor of ion channels and their types**

Jianzhao Gao<sup>1</sup>, Wei Cui<sup>2</sup>, Yajun Sheng<sup>3</sup>, Jishou Ruan<sup>1,4\*</sup> and Lukasz Kurgan<sup>5,6\*</sup>

<sup>1</sup>School of Mathematical Sciences and LPMC, Nankai University, Tianjin, People's Republic of China.

<sup>2</sup>Department of Statistics, University of California, Riverside, California, United States.

<sup>3</sup>Graduate School at Shenzhen, Tsinghua University, Shenzhen, People's Republic of China.

<sup>4</sup>State Key Laboratory of Medicinal Chemical Biology, Nankai University, Tianjin, People's Republic of China.

<sup>5</sup>Department of Electrical and Computer Engineering, University of Alberta, Edmonton, Alberta, Canada.

<sup>6</sup>Department of Computer Science, Virginia Commonwealth University, Richmond, Virginia, USA.

\* Correspondence to:

Lukasz Kurgan, email: lkurgan@vcu.edu

Jishou Ruan, email: jsruan@nankai.edu.cn

**Table A. Results of the feature selection and optimization of the three predictive models for ion channels, ion channel types, and subtypes of voltage-gated channels.**

The table shows results for different cut-offs for the minimal biserial correlation coefficients (BCC) computed between values of a given feature and the binary outcomes (step 2 of feature selection) and the maximal Pearson’s correlation coefficient (PCC) between features (step 3), the maximal MCC value obtained via wrapper-based feature selection (step 4) and the optimal SVM parameters (step 5) that were computed via five-fold cross validation on the corresponding training dataset, and the final number of selected features. Predictions from the five test folds in the cross validations were averaged and we also show the corresponding standard deviations in round brackets. The selected setup for each of the three predictors is shown in bold font.

| BCC  | PCC  | Maximal value of average (over 5 folds) MCC based on selected feature sets (step 4) |                                       |                                       | Optimal SVM parameters ( $\pm C$ , $\gamma$ ) |                  |                               | Number of features |                  |                               |
|------|------|-------------------------------------------------------------------------------------|---------------------------------------|---------------------------------------|-----------------------------------------------|------------------|-------------------------------|--------------------|------------------|-------------------------------|
|      |      | Ion channel                                                                         | Ion channel type                      | Voltage-gated channel subtype         | Ion channel                                   | Ion channel type | Voltage-gated channel subtype | Ion channel        | Ion channel type | Voltage-gated channel subtype |
| 0.1  | 0.9  | 0.835 ( $\pm 0.053$ )                                                               | 0.927 ( $\pm 0.055$ )                 | 0.684 ( $\pm 0.152$ )                 | 8, 0.0625                                     | 4, 0.0625        | 16, 0.0625                    | 190                | 158              | 46                            |
|      | 0.85 | 0.832 ( $\pm 0.052$ )                                                               | 0.933 ( $\pm 0.041$ )                 | 0.663 ( $\pm 0.114$ )                 | 8, 0.0625                                     | 4, 0.03125       | 8, 0.25                       | 205                | 122              | 29                            |
|      | 0.8  | 0.829 ( $\pm 0.077$ )                                                               | 0.921 ( $\pm 0.044$ )                 | 0.678 ( $\pm 0.033$ )                 | 16, 0.03125                                   | 0.5, 0.0625      | 4, 0.0625                     | 171                | 102              | 48                            |
|      | 0.75 | <b>0.836 (<math>\pm 0.051</math>)</b>                                               | 0.933 ( $\pm 0.041$ )                 | 0.676 ( $\pm 0.134$ )                 | <b>4, 0.03125</b>                             | 2, 0.0625        | 32, 0.007812                  | 172                | 103              | 71                            |
|      | 0.7  | 0.796 ( $\pm 0.070$ )                                                               | 0.933 ( $\pm 0.048$ )                 | 0.616 ( $\pm 0.079$ )                 | 8, 0.0625                                     | 4, 0.0625        | 16, 0.007812                  | 150                | 107              | 63                            |
| 0.15 | 0.9  | 0.798 ( $\pm 0.066$ )                                                               | 0.928 ( $\pm 0.048$ )                 | 0.667 ( $\pm 0.121$ )                 | 2, 0.125                                      | 2, 0.125         | 4, 0.0625                     | 138                | 109              | 53                            |
|      | 0.85 | 0.788 ( $\pm 0.069$ )                                                               | 0.934 ( $\pm 0.023$ )                 | 0.663 ( $\pm 0.114$ )                 | 4, 0.125                                      | 2, 0.0625        | 8, 0.25                       | 134                | 102              | 29                            |
|      | 0.8  | 0.776 ( $\pm 0.072$ )                                                               | 0.926 ( $\pm 0.045$ )                 | 0.678 ( $\pm 0.033$ )                 | 4, 0.125                                      | 2, 0.0625        | 4, 0.0625                     | 92                 | 80               | 48                            |
|      | 0.75 | 0.802 ( $\pm 0.055$ )                                                               | 0.908 ( $\pm 0.046$ )                 | 0.676 ( $\pm 0.134$ )                 | 4, 0.125                                      | 4, 0.125         | 32, 0.007812                  | 114                | 110              | 71                            |
|      | 0.7  | 0.787 ( $\pm 0.057$ )                                                               | 0.922 ( $\pm 0.049$ )                 | 0.616 ( $\pm 0.079$ )                 | 2, 0.0625                                     | 0.5, 0.03125     | 16, 0.007812                  | 99                 | 82               | 63                            |
| 0.2  | 0.9  | 0.773 ( $\pm 0.072$ )                                                               | 0.920 ( $\pm 0.069$ )                 | 0.736 ( $\pm 0.123$ )                 | 8, 0.03125                                    | 1, 0.125         | 4, 0.0625                     | 70                 | 77               | 48                            |
|      | 0.85 | 0.765 ( $\pm 0.056$ )                                                               | 0.908 ( $\pm 0.063$ )                 | 0.580 ( $\pm 0.145$ )                 | 8, 0.125                                      | 4, 0.125         | 2, 0.25                       | 69                 | 94               | 37                            |
|      | 0.8  | 0.768 ( $\pm 0.028$ )                                                               | 0.914 ( $\pm 0.037$ )                 | 0.638 ( $\pm 0.087$ )                 | 8, 0.125                                      | 0.5, 0.25        | 16, 0.0625                    | 72                 | 76               | 68                            |
|      | 0.75 | 0.763 ( $\pm 0.069$ )                                                               | <b>0.933 (<math>\pm 0.041</math>)</b> | 0.609 ( $\pm 0.115$ )                 | 8, 0.03125                                    | <b>2, 0.25</b>   | 4, 0.25                       | 60                 | 56               | 28                            |
|      | 0.7  | 0.774 ( $\pm 0.067$ )                                                               | 0.919 ( $\pm 0.031$ )                 | 0.633 ( $\pm 0.113$ )                 | 16, 0.125                                     | 1, 0.0625        | 2, 0.25                       | 64                 | 65               | 32                            |
| 0.25 | 0.9  | 0.742 ( $\pm 0.058$ )                                                               | 0.921 ( $\pm 0.036$ )                 | 0.707 ( $\pm 0.100$ )                 | 4, 0.25                                       | 1, 0.25          | 16, 0.0625                    | 40                 | 63               | 32                            |
|      | 0.85 | 0.755 ( $\pm 0.045$ )                                                               | 0.892 ( $\pm 0.066$ )                 | 0.673 ( $\pm 0.087$ )                 | 8, 0.25                                       | 16, 0.015625     | 32, 0.0625                    | 38                 | 60               | 33                            |
|      | 0.8  | 0.759 ( $\pm 0.064$ )                                                               | 0.913 ( $\pm 0.050$ )                 | 0.669 ( $\pm 0.097$ )                 | 4, 0.5                                        | 2, 0.125         | 32, 0.0625                    | 39                 | 69               | 26                            |
|      | 0.75 | 0.760 ( $\pm 0.083$ )                                                               | 0.893 ( $\pm 0.076$ )                 | <b>0.740 (<math>\pm 0.100</math>)</b> | 8, 0.5                                        | 0.5, 0.25        | <b>4, 0.125</b>               | 29                 | 41               | 25                            |
|      | 0.7  | 0.739 ( $\pm 0.064$ )                                                               | 0.878 ( $\pm 0.051$ )                 | 0.602 ( $\pm 0.110$ )                 | 2, 0.5                                        | 1, 0.25          | 8, 0.125                      | 27                 | 42               | 26                            |
| 0.3  | 0.9  | 0.684 ( $\pm 0.075$ )                                                               | 0.908 ( $\pm 0.053$ )                 | 0.599 ( $\pm 0.161$ )                 | 2, 0.5                                        | 1, 0.25          | 16, 0.0625                    | 22                 | 53               | 31                            |
|      | 0.85 | 0.698 ( $\pm 0.052$ )                                                               | 0.906 ( $\pm 0.055$ )                 | 0.656 ( $\pm 0.093$ )                 | 1, 1                                          | 2, 0.125         | 16, 0.25                      | 21                 | 37               | 25                            |
|      | 0.8  | 0.698 ( $\pm 0.052$ )                                                               | 0.914 ( $\pm 0.036$ )                 | 0.701 ( $\pm 0.131$ )                 | 1, 1                                          | 1, 0.5           | 8, 0.25                       | 21                 | 38               | 31                            |
|      | 0.75 | 0.699 ( $\pm 0.055$ )                                                               | 0.907 ( $\pm 0.064$ )                 | 0.654 ( $\pm 0.149$ )                 | 1, 1                                          | 1, 0.5           | 16, 0.125                     | 20                 | 33               | 25                            |
|      | 0.7  | 0.673 ( $\pm 0.064$ )                                                               | 0.893 ( $\pm 0.073$ )                 | 0.573 ( $\pm 0.050$ )                 | 0.5, 1.0                                      | 2, 0.015625      | 32, 0.125                     | 16                 | 33               | 22                            |

**Table B. False positive rates (FPRs) and sensitivity values obtained by PSIONplus and BLAST on the three test datasets.**

| Measure     | Methods   | TEST30 <sub>ION</sub> | TEST30 <sub>VLG</sub> | TEST60 <sub>VGS</sub> |       |         |        |         |
|-------------|-----------|-----------------------|-----------------------|-----------------------|-------|---------|--------|---------|
|             |           |                       |                       | Potassium             | Anion | Calcium | Sodium | average |
| FPR         | BLAST     | 1                     | 52.9                  | 18.5                  | 0     | 0       | 0      | 4.6     |
|             | PSIONplus | 19.2                  | 52.9                  | 10.1                  | 0     | 2.6     | 0      | 3.2     |
| Sensitivity | BLAST     | 47.9                  | 76.7                  | 100                   | 76.6  | 83.7    | 87.0   | 86.8    |
|             | PSIONplus | 90.4                  | 76.7                  | 99.2                  | 78.7  | 93.9    | 87.0   | 89.7    |
